# Supplementary material
Source: Springer Nature journal article supplement (https://www.springermedizin.de/resource/supplementary/13049_2013_796_MOESM2_ESM.pdf/9667234)

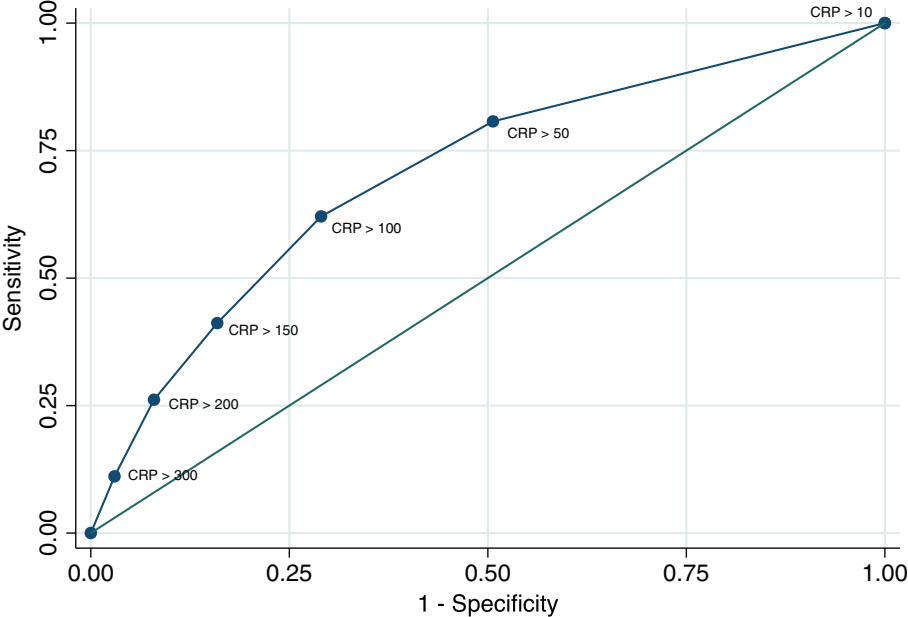

Area under ROC curve = 0.7058

Supplement: MOESM2 [file 9667234]
